# Supplementary material
Source: publisher figshare collection journal article supplement (https://acs.figshare.com/ndownloader/files/12261257)
Supplement: Supplementary file 1 [file 12261257]

## Supporting Information

### Salt-responsive “Killing and Release” Antibacterial Surfaces of Mixed Polymer Brushes

Yanhong Fu<sup>†</sup>, Yang Wang<sup>†</sup>, Lei Huang<sup>†</sup>, Shengwei Xiao<sup>†</sup>, Feng Chen<sup>†</sup>, Ping Fan<sup>†</sup>, Mingqiang  
Zhong<sup>†</sup>, Jun Tan<sup>\*‡</sup>, Jintao Yang<sup>\*†</sup>

<sup>†</sup> College of Materials Science & Engineering  
Zhejiang University of Technology, Hangzhou 310014, P. R. China

<sup>‡</sup> College of Biological, Chemical Science and Technology  
Jiaxing University, Jiaxing 314001, P. R. China

**\*Corresponding Author:** J.T. [tanjunzjxu@126.com](mailto:tanjunzjxu@126.com); J.Y. [yangjt@zjut.edu.cn](mailto:yangjt@zjut.edu.cn)

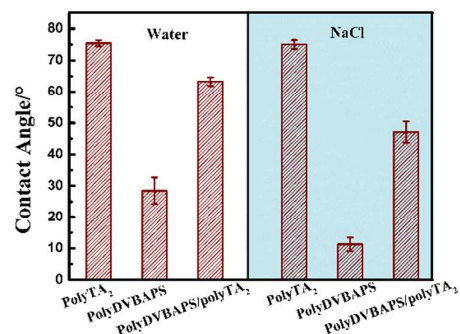

**Figure S1.** Water contact angles of silicon surfaces with polyTA, polyDVBAPS and the mixed polyDVBAPS/polyTA<sub>2</sub> brushes in water and saturated NaCl solution.

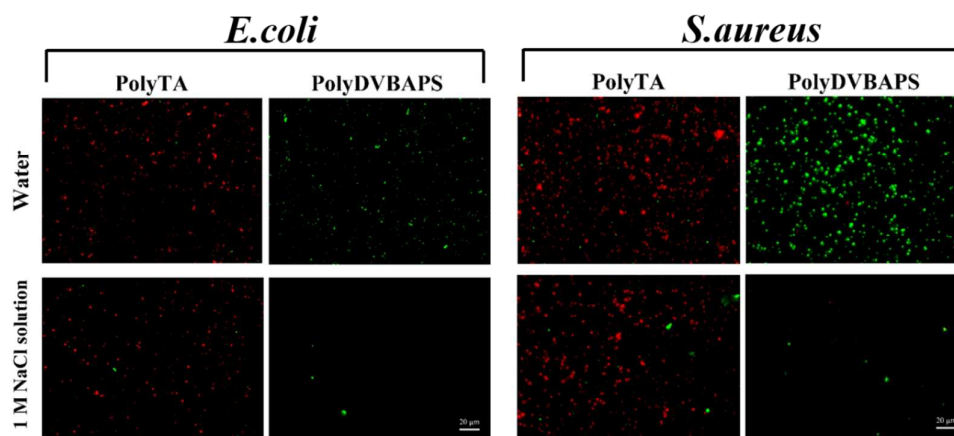

**Figure S2.** Representative fluorescent images of attached bacteria on pristine polyTA and polyDVBAPS before and after the treatments of 1M NaCl solutions.

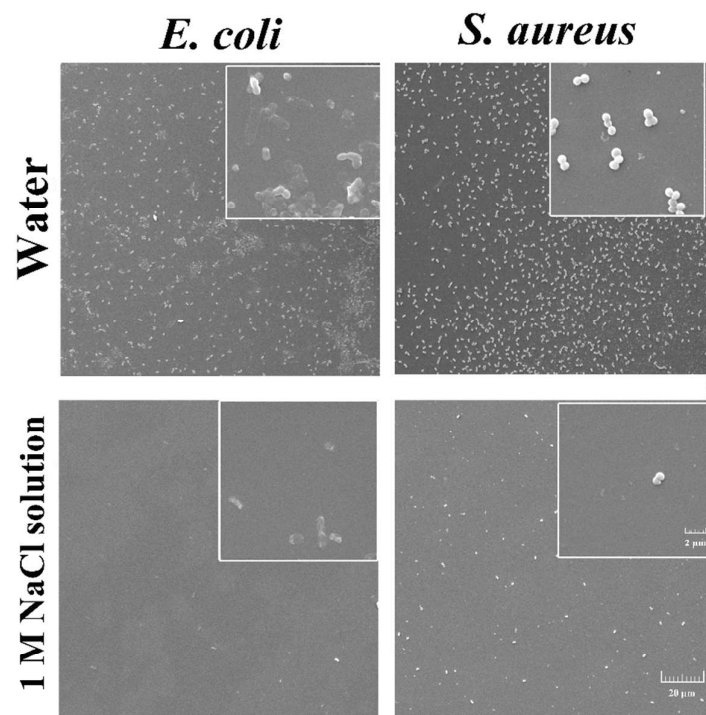

**Figure S3.** Representative SEM images of attached *E. coli* and *S. aureus* on polyDVBAPS/polyTA mixed brush surface before and after 1M NaCl washing.
